# Supplementary material for: Early-life exercise induces immunometabolic epigenetic modification enhancing anti-inflammatory immunity in middle-aged male mice
Source: PubMed Central journal article supplement (PMC11006929; doi:10.1038/s41467-024-47458-3), 2024-04-10

**Early-life exercise induces immunometabolic epigenetic modification enhancing anti-inflammatory immunity in middle-aged male mice**

Nini Zhang<sup>1,2†</sup>, Xinpei Wang<sup>1†</sup>, Mengya Feng<sup>1,3</sup>, Min Li<sup>1</sup>, Jing Wang<sup>4</sup>, Hongyan Yang<sup>1</sup>, Siyu He<sup>1</sup>, Ziqi Xia<sup>1</sup>, Lei Shang<sup>5</sup>, Xun Jiang<sup>2</sup>, Mao Sun<sup>6</sup>, Yuanming Wu<sup>6</sup>, Chaoxue Ren<sup>7</sup>, Xing Zhang<sup>1</sup>, Jia Li<sup>1,5\*</sup>, Feng Gao<sup>1\*</sup>

<sup>1</sup>Key Laboratory of Aerospace Medicine, Ministry of Education; School of Aerospace Medicine, Fourth Military Medical University, Xi'an, China. <sup>2</sup>Department of Pediatrics, Tangdu Hospital, Fourth Military Medical University, Xi'an, China. <sup>3</sup>Center for Mitochondrial Biology and Medicine, The Key Laboratory of Biomedical Information Engineering of Ministry of Education, School of Life Science and Technology, Xi'an Jiaotong University, Xi'an, China. <sup>4</sup>Department of Orthopedics, Xijing Hospital, Fourth Military Medical University, Xi'an, China. <sup>5</sup>Key Lab of Hazard Assessment and Control in Special Operational Environment, Ministry of Education; Department of Health Statistics, School of Public Health, Fourth Military Medical University, Xi'an, China. <sup>6</sup>Department of Biochemistry and Molecular Biology, Center for DNA Typing, Fourth Military Medical University, Xi'an China. <sup>7</sup>School of Sport and Health Science, Xi'an Physical Education University, Xi'an, China.

<sup>†</sup>These authors contributed equally: Nini Zhang, Xinpei Wang.

**\*Corresponding authors:** Jia Li, [jjiali816@fmmu.edu.cn](mailto:jjiali816@fmmu.edu.cn); Feng Gao, [fgao@fmmu.edu.cn](mailto:fgao@fmmu.edu.cn)

**Supplementary Figures 1-7**

**Supplementary Tables 1-6**

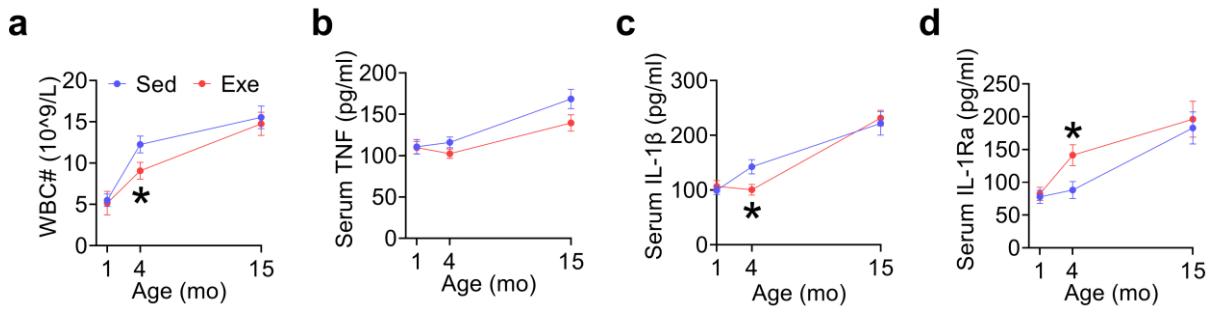

24

25 **Supplementary Fig. 1 Effects of early-life exercise training on leucocytes and cytokines at**  
 26 **different age. (a-d)** White blood cell (WBC) count, serum TNF, IL-1β and IL-1Ra of Sed and Exe  
 27 mice at different age (1, 4 and 15 months old). n=8 per group. Values are presented as mean ± SEM.  
 28 Data are analyzed by using the two-way repeated measures ANOVA followed by Bonferroni's test. \*  
 29 *p* < 0.05; exact *p* values are listed in Source Data file. Sed=sedentary; Exe=exercise. Source data are  
 30 provided as a Source Data file.

31

32

33

34

35

36

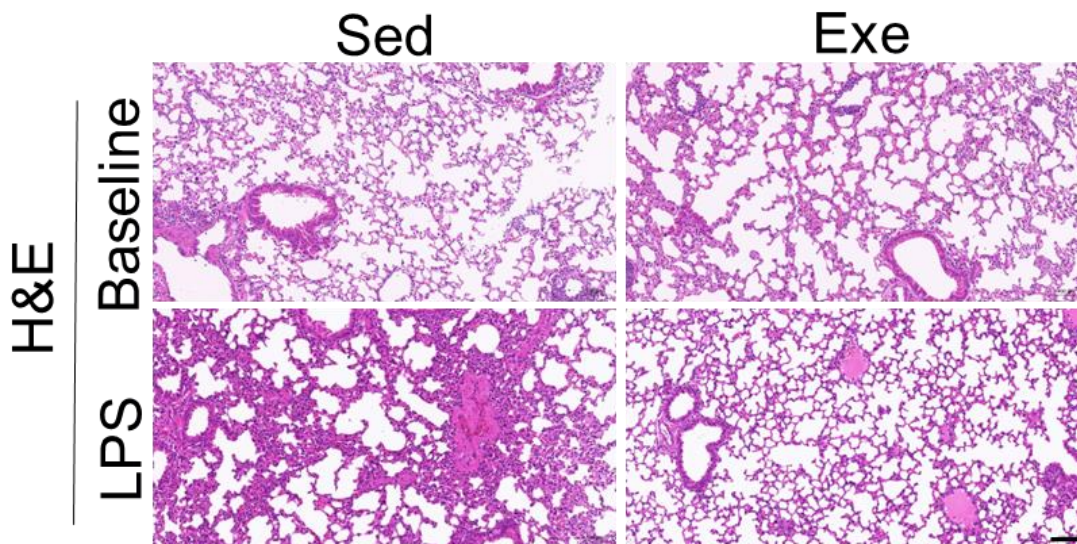

37

38 **Supplementary Fig. 2 Early-life exercise reduced inflammatory injury in the lung of mice when**  
 39 **exposed to LPS in middle age.** Representative images of hematoxylin and eosin (H&E)-stained  
 40 lung sections of mice at baseline and 48 hours after LPS infection. Scale bar, 50 μm.

41

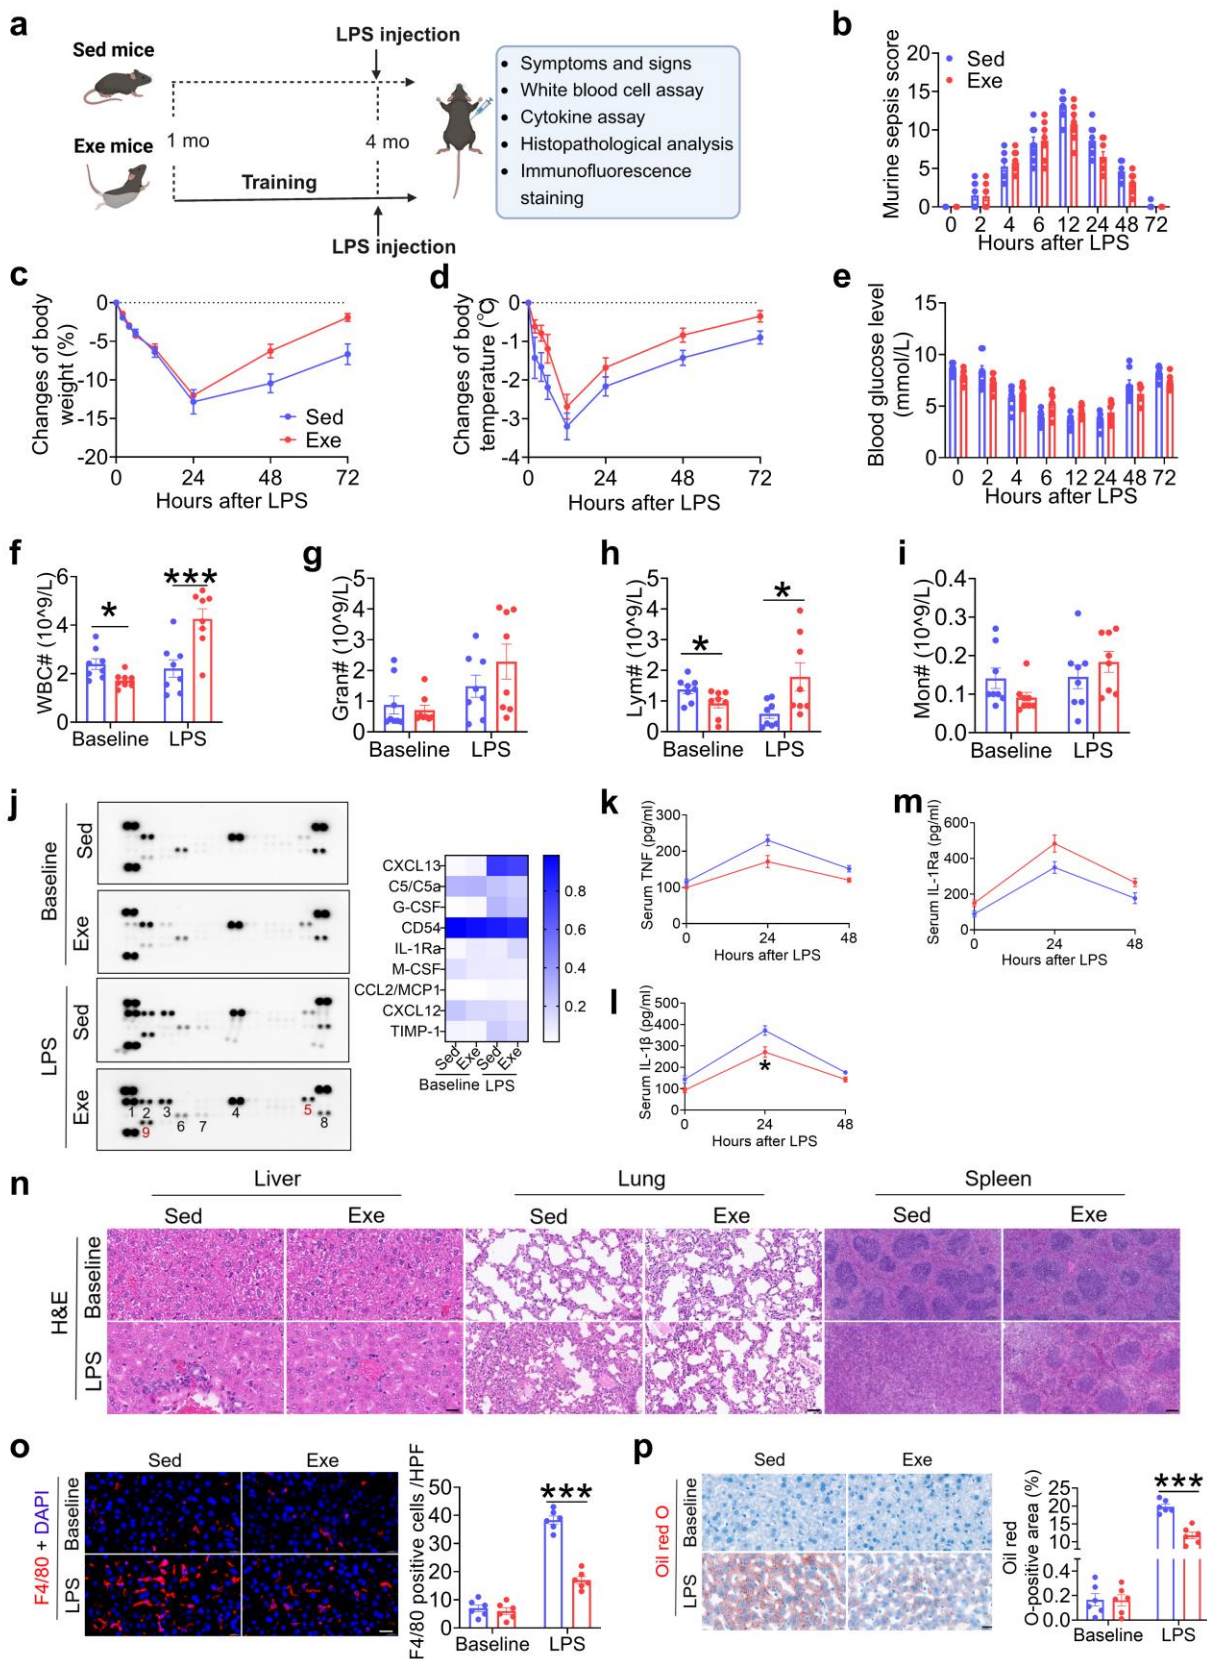

42

43 **Supplementary Fig. 3 Three-month swim training protected vital organs against LPS-induced**  
 44 **sepsis in mice. a** Experimental outline (created with Biorender.com). C57BL/6 mice were subjected

45 to swimming exercise for 3 months starting from 1-month-old. After 24 hours post 3-month exercise  
 46 training, mice were subjected to a single i.p. injection of LPS. The clinical severity score **b**, changes  
 47 of body weight **c**, changes of body temperature **d** and blood glucose level **e** in different time points (0,  
 48 2, 4, 6, 12, 24, 48 and 72 hours) after injection. **f-i** The quantity of WBCs, granulocytes, lymphocytes  
 49 and monocytes in the blood at baseline and 6 hours after LPS infection. **j** Cytokine array analysis in  
 50 the serum at baseline and 24 hours after LPS infection. **k-m** Serum TNF, IL-1 $\beta$  and IL-1Ra levels at  
 51 0, 24 and 48 hours after LPS infection. n=6 per group. **(N)** Representative images of hematoxylin  
 52 and eosin-stained (H&E) liver (scale bar, 20  $\mu$ m), lung (scale bar, 50  $\mu$ m) and spleen (scale bar, 50  
 53  $\mu$ m) sections of mice at baseline and 48 hours after LPS infection. **o** Representative images and  
 54 quantitate analysis of F4/80 (red) staining in the liver sections of mice at baseline and 48 hours after  
 55 LPS infection. n=6 per group. Scale bar, 20  $\mu$ m. **p** Representative images and quantitate analysis of  
 56 Oil red O-staining in the liver sections of mice at baseline and 48 hours after LPS infection. n=6 per  
 57 group. Scale bar, 20  $\mu$ m. Values are presented as mean  $\pm$  SEM. Data are analyzed using the two-way  
 58 repeated measures ANOVA followed by Bonferroni's test (**b-e**, **k-l**) or unpaired, two-tailed Student's  
 59 t-test (f, h, o-p) or Mann-Whitney U test (g, i). \*  $p < 0.05$ ; \*\*  $p < 0.01$ ; \*\*\*  $p < 0.001$ ; exact  $p$  values  
 60 are listed in Source Data file. Sed=sedentary; Exe=exercise. Source data are provided as a Source  
 61 Data file.

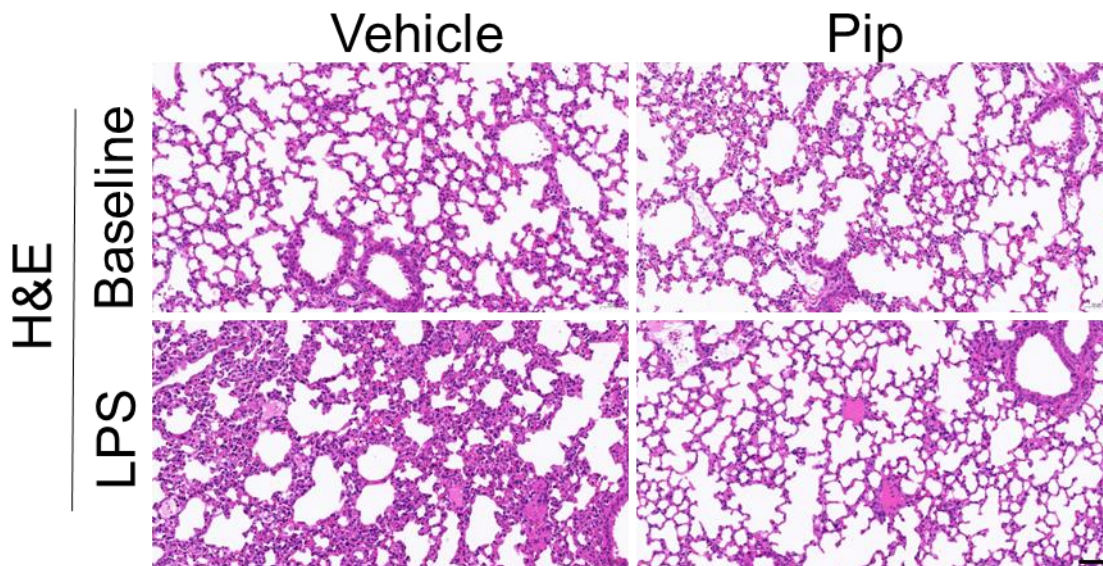

66  
 67 **Supplementary Fig. 4 Pipecolic acid administration reduced inflammatory injury in the lung of**  
 68 **mice exposed to LPS.** Representative images of hematoxylin and eosin (H&E)-stained lung  
 69 sections of mice at baseline and 48 hours after LPS infection. Scale bar, 50  $\mu$ m. Pip=pipecolic acid.

70

71

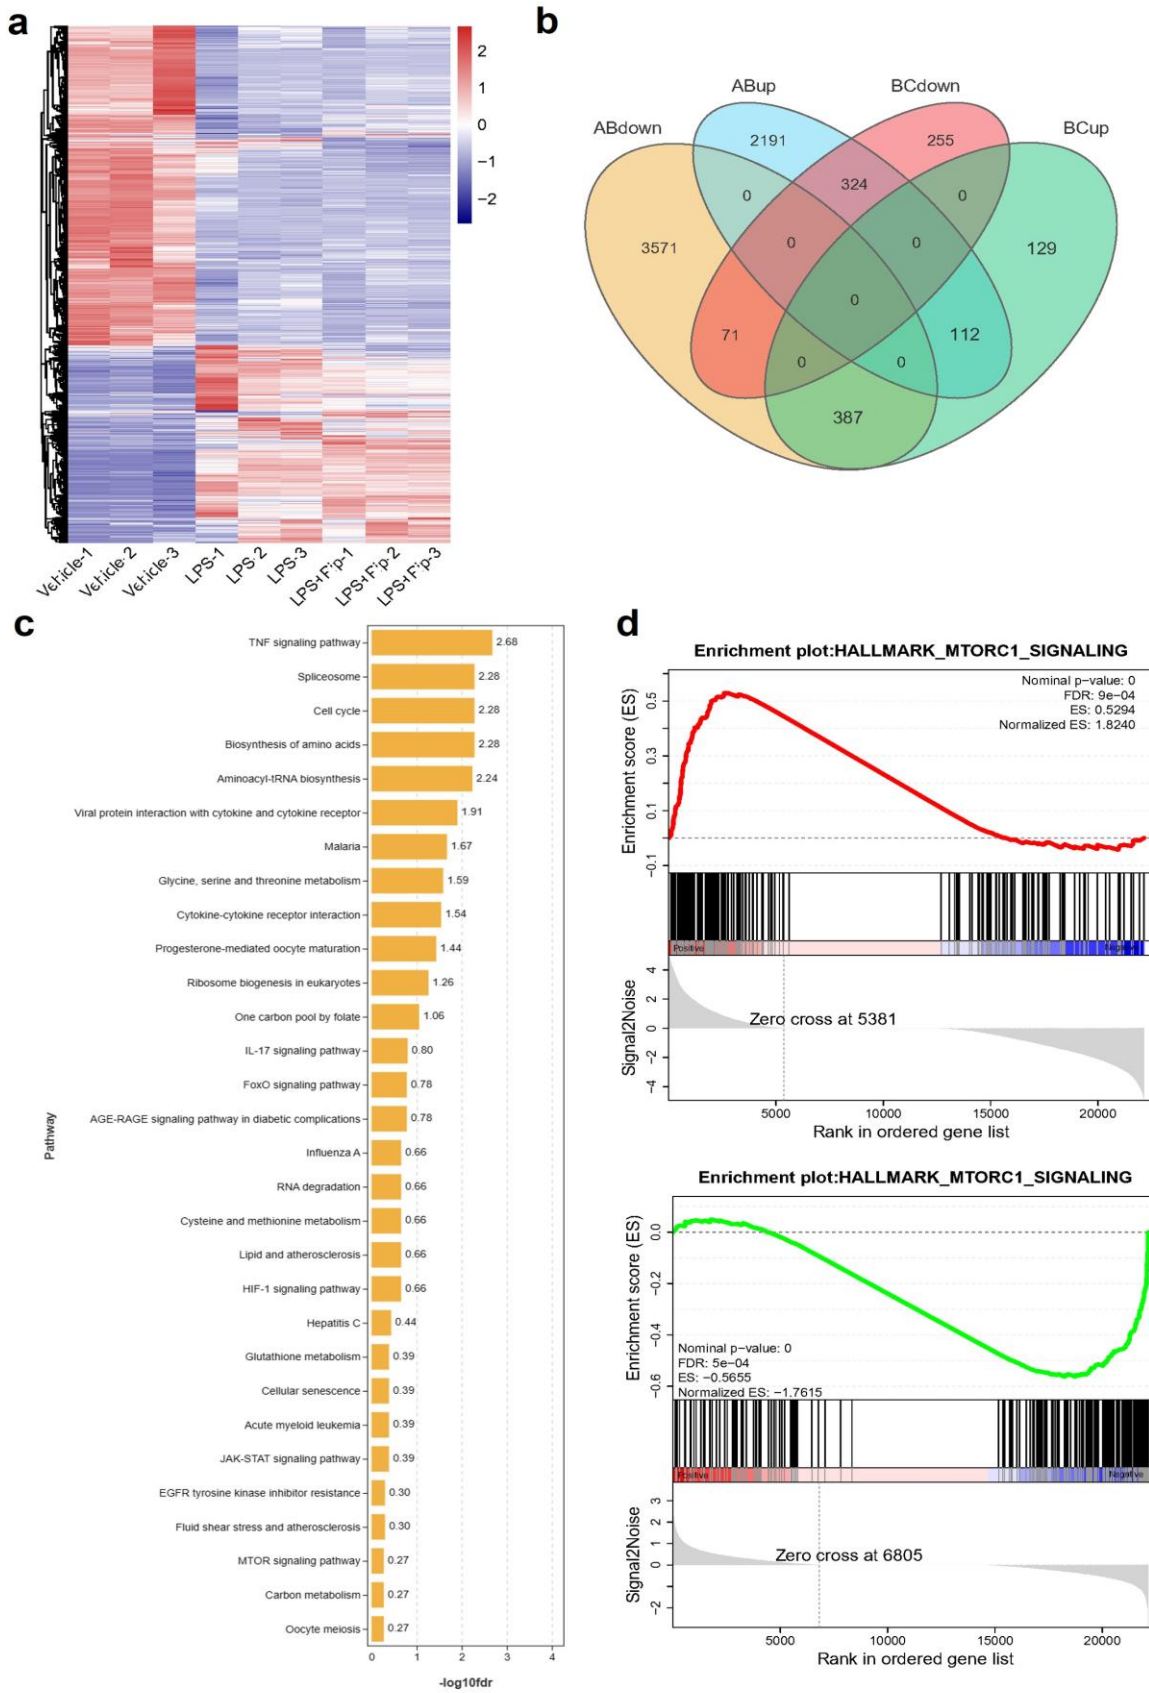

72

73 **Supplementary Fig. 5** Pipecolic acid inhibited LPS-induced mTORC1 signaling in  
 74 macrophages. **a** Gene expression heatmap of DEGs (n=3). **b** Number of genes significantly different

75 in LPS vs. vehicle control and/or in LPS+Pip vs. LPS in BMDMs (n=3). A=Vehicle; B=LPS;  
76 C=LPS+Pip. **c** KEGG analysis of 324 DEGs that were upregulated in BMDMs with LPS stimulation  
77 but downregulated after pipecolic acid treatment. **d** GSEA analysis of mTORC1 signaling pathway.  
78 Pip=pipecolic acid.

79

80

81

82

83

84

85

86

87

88

89

90

91

92

93

94

95

96

97

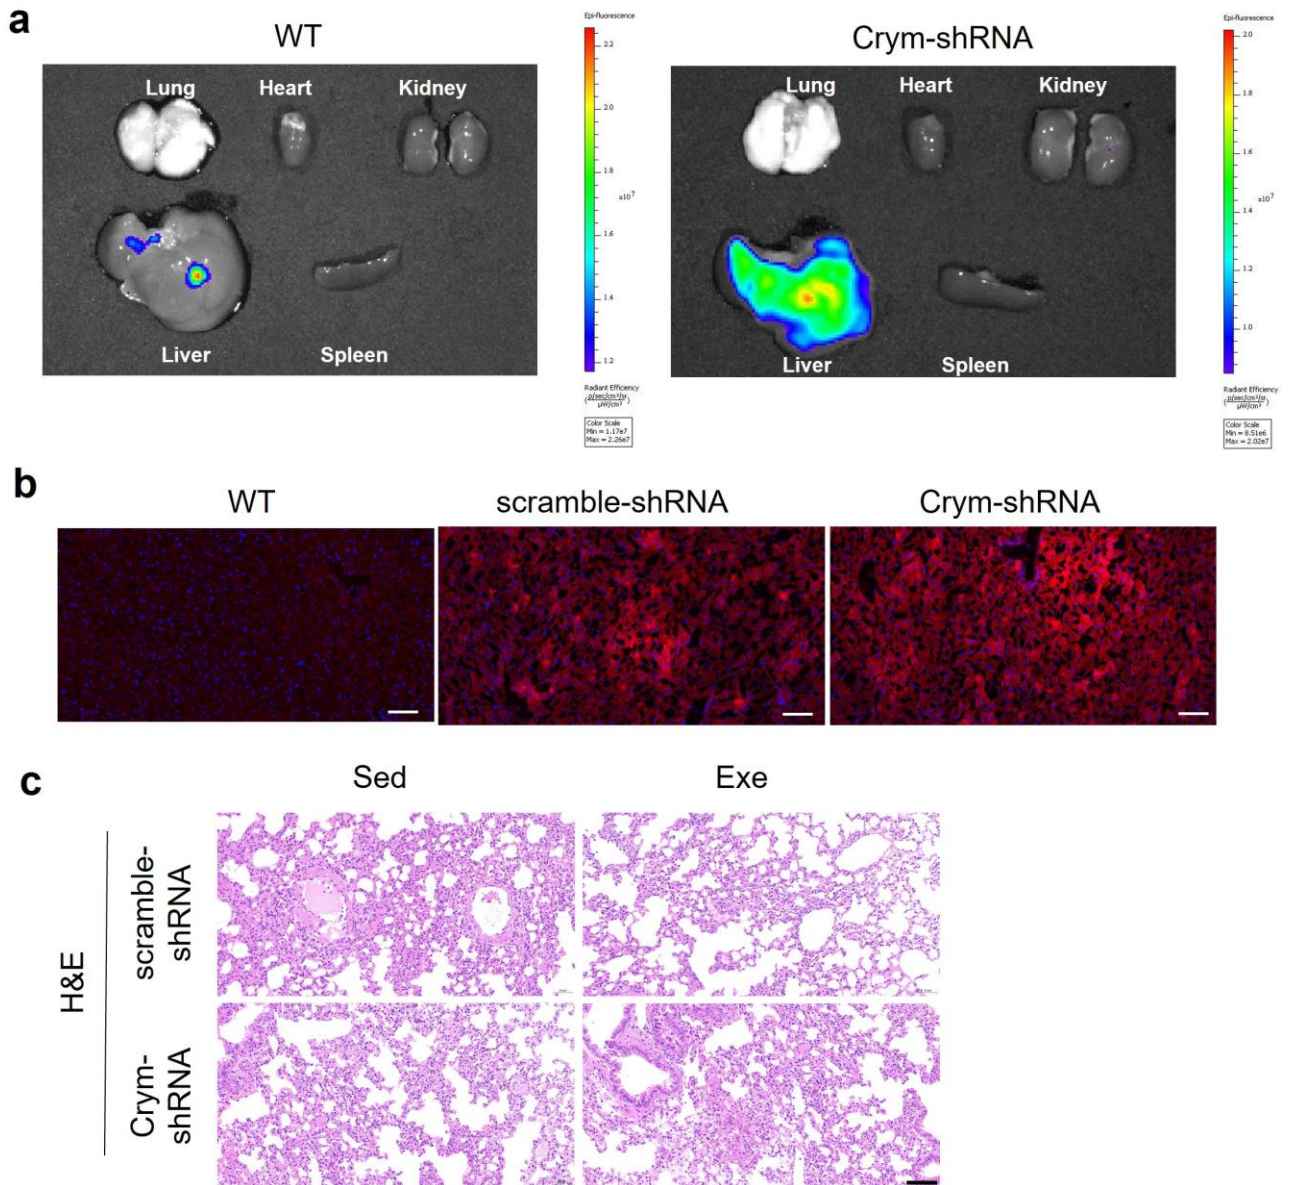

98  
 99 **Supplementary Fig. 6 Determination of transfection efficiency in the liver.** **a** Representative  
 100 images of mCherry fluorescence in different tissues in wild-type mice and mice injected with the  
 101 serotype 8 adeno-associated virus (AAV8) vector carrying shRNA targeting Crym (Crym-shRNA). **b**  
 102 mCherry, an indicator for the AAV8 vector, was detectable by confocal microscopy in liver  
 103 transfected with AAV8. **c** Representative images of hematoxylin and eosin (H&E)-stained lung  
 104 sections of mice at 48 hours after LPS infection. Scale bar, 50 μm.

105

106

107

108

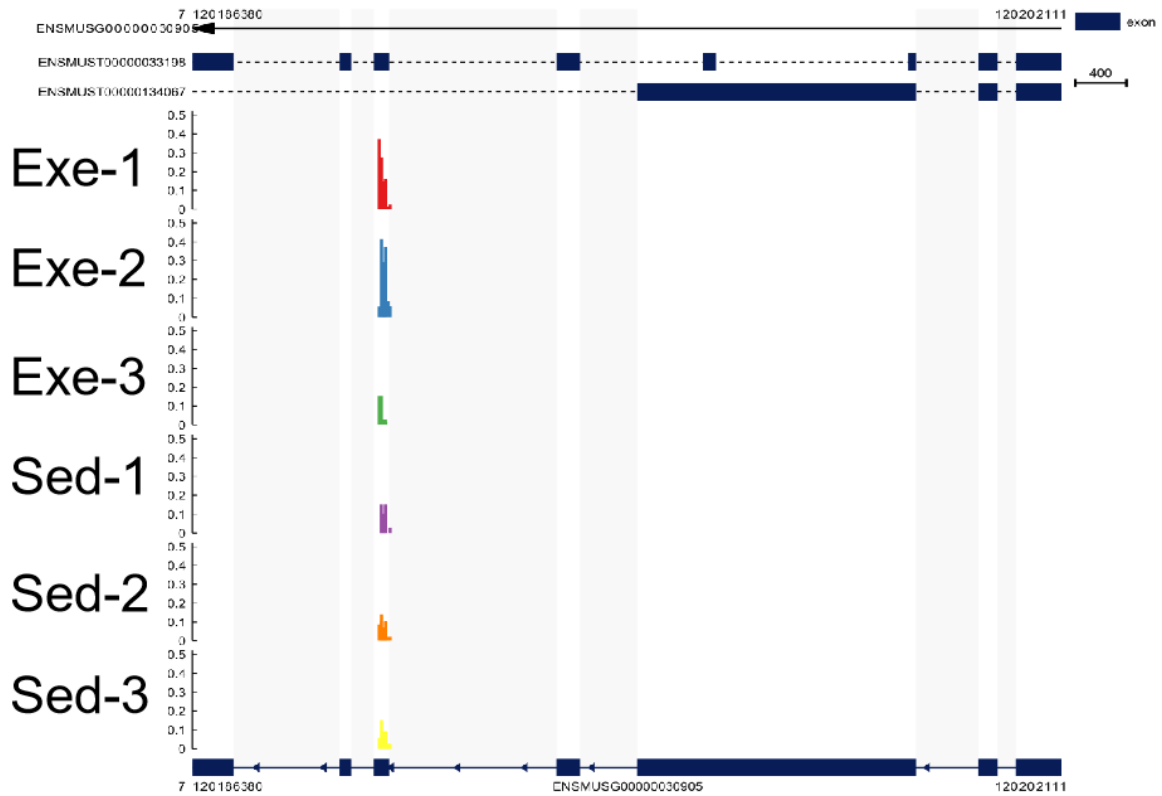

109

110

111 **Supplementary Fig. 7 DNA methylation level of *Crym* gene in the liver of Exe and Sed mice.**

112 The representative images of DNA methylation of *Crym* gene in the liver of Sed and Exe mice aged

113 at 15 months (n=3 for each group). The image was obtained from Whole Genome Bisulfite

114 Sequencing (WGBS). The number on the Y axis indicates RPM (Reads per million), a parameter that

115 measure the degree of enrichment. Sed=sedentary; Exe=exercise.

116

117

118

119

120

121

122

123

124

125

126

127

128

129

130

131

132

133



**Supplementary Table 1 Murine Sepsis Score (MSS).**

| <b>Variable</b>        | <b>Score and description</b>                                                                                                                                                                                                                                                                                                                                                                                                            |
|------------------------|-----------------------------------------------------------------------------------------------------------------------------------------------------------------------------------------------------------------------------------------------------------------------------------------------------------------------------------------------------------------------------------------------------------------------------------------|
| Appearance             | 0. Coat is smooth<br>1. Patches of hair piloerected<br>2. Majority of back is piloerected<br>3. Piloerection may or may not be present, mouse appears “puffy”<br>4. Piloerection may or may not be present, mouse appears emaciated                                                                                                                                                                                                     |
| Level of consciousness | 0. Mouse is active<br>1. Mouse is active but avoids standing upright<br>2. Mouse activity is noticeably slowed. The mouse is still ambulant<br>3. Activity is impaired. Mouse only moves when provoked, movements have a tremor<br>4. Activity severely impaired. Mouse remains stationary when provoked, with possible tremor                                                                                                          |
| Activity               | 0. Normal amount of activity. Mouse is involved in any of the following activities: Eating, drinking, climbing, running, fighting<br>1. Slightly suppressed activity. Mouse is moving around bottom of cage<br>2. Suppressed activity. Mouse is stationary with occasional investigative movements<br>3. No activity. Mouse is stationary<br>4. No activity. Mouse experiencing tremors, particularly in the hind legs                  |
| Response to stimulus   | 0. Mouse responds immediately to auditory stimulus or touch<br>1. Slow or no response to auditory stimulus, strong response to touch (moves to escape)<br>2. No response to auditory stimulus, moderate response to touch (moves a few steps)<br>3. No response to auditory stimulus, mild response to touch (no locomotion)<br>4. No response to auditory stimulus. Little or no response to touch. Cannot right itself if pushed over |

|                     |                                                                                       |
|---------------------|---------------------------------------------------------------------------------------|
| Eyes                | 0. Open                                                                               |
|                     | 1. Eyes not fully open, possibly with secretions                                      |
|                     | 2. Eyes at least half closed, possibly with secretions                                |
|                     | 3. Eyes half closed or more, possibly with secretions                                 |
|                     | 4. Eyes closed or milky                                                               |
| Respiration rate    | 0. Normal, rapid mouse respiration                                                    |
|                     | 1. Slightly decreased respiration (rate not quantifiable by eye)                      |
|                     | 2. Moderately reduced respiration (rate at the upper range of quantifying by eye)     |
|                     | 3. Severely reduced respiration (rate easily countable by eye, 0.5 s between breaths) |
|                     | 4. Extremely reduced respiration (>1 s between breaths)                               |
| Respiration quality | 0. Normal                                                                             |
|                     | 1. Brief periods of labored breathing                                                 |
|                     | 2. Labored breathing, no gasping                                                      |
|                     | 3. Labored with intermittent gasping                                                  |
|                     | 4. Gasping                                                                            |

---

135

136

137

138

139

140

141

142

143

144

145

**Supplementary Table 2 Differentially concentrated metabolites of serum in 4-month-old mice.**

| Name                                                                                             | Log2_FC(case<br>mean/control mean) | P value            | FDR             | VIP         |
|--------------------------------------------------------------------------------------------------|------------------------------------|--------------------|-----------------|-------------|
| LysoPC(22:6(4Z,7Z,10Z,13Z,16Z,19Z))                                                              | -0.469246443                       | 2.28E-06           | 0.000650        | 17.24       |
| LysoPC(20:4(5Z,8Z,11Z,14Z))                                                                      | -0.309256502                       | 0.007092532        | 0.115503        | 10.61       |
| 4-(trimethylazaniumyl)butanoate                                                                  | -0.428402948                       | 5.23E-05           | 0.005813        | 6.66        |
| 8-Hydroxypinoresinol 4-glucoside                                                                 | -0.89700277                        | 0.003308631        | 0.073488        | 5.98        |
| L-Glutamic acid                                                                                  | -0.584110383                       | 0.000408211        | 0.021799        | 4.33        |
| <b>Pipecolic acid</b>                                                                            | <b>0.480569672</b>                 | <b>0.035910594</b> | <b>0.291683</b> | <b>3.19</b> |
| 1-Methylhistidine                                                                                | -0.330394428                       | 0.00302549         | 0.069318        | 2.93        |
| 6-amino-1H-pyrimidin-2-one                                                                       | -0.210864781                       | 0.02241995         | 0.227601        | 2.85        |
| PC(22:6(4Z,7Z,10Z,13Z,16Z,19Z)/18:3(6Z,9Z,12Z))                                                  | -0.097735599                       | 0.048334545        | 0.334517        | 2.02        |
| 13-chloro-2-piperidin-4-ylidene-4-azatricyclo[9.4.0.0.3,8]pentadeca-1(11),3(8),4,6,12,14-hexaene | -0.359038516                       | 0.026379347        | 0.247615        | 1.73        |
| 2-(1H-imidazol-5-yl)acetic acid                                                                  | -0.331847781                       | 0.005249074        | 0.095826        | 1.62        |
| Netilmicin                                                                                       | -1.787031359                       | 0.000282823        | 0.017316        | 1.60        |
| 1-(1-Pyrrolidinyl)-2-propanone                                                                   | 0.644425926                        | 0.034765212        | 0.287172        | 1.53        |
| Glycerylphosphorylethanolamine                                                                   | -0.690026499                       | 0.003045045        | 0.069566        | 1.50        |
| 1-Pyrroline-4-hydroxy-2-carboxylate                                                              | -0.281631881                       | 0.01056608         | 0.148372        | 1.32        |
| Montecristin                                                                                     | -0.769968343                       | 0.001007683        | 0.036625        | 1.25        |
| 5-Aminoimidazole ribonucleotide                                                                  | -0.352058443                       | 0.00094352         | 0.035090        | 1.25        |
| (2S)-5-oxopyrrolidine-2-carboxylic acid                                                          | -0.2931504                         | 0.037033398        | 0.296119        | 1.17        |
| PA(18:1(9Z)/20:5(5Z,8Z,11Z,14Z,17Z))                                                             | 0.892742013                        | 6.05E-05           | 0.006362        | 1.12        |
| 6-Deoxohomodolichosterone                                                                        | 0.61709148                         | 0.003367733        | 0.074183        | 1.04        |

147 *p* values are determined by unpaired, two-tailed Student's t-test, FDR were subsequently determined  
148 by Benjamini-Hochberg correction method. Abbreviations: VIP, variable importance in projection;  
149 FC, fold change; FDR, false discovery rate.

**Supplementary Table 3 Differentially concentrated metabolites of serum in 15-month-old mice.**

| Name                                                            | Log <sub>2</sub> _FC(case mean/control mean) | P value         | FDR             | VIP         |
|-----------------------------------------------------------------|----------------------------------------------|-----------------|-----------------|-------------|
| L-Arginine                                                      | -0.26842                                     | 0.022466        | 0.432115        | 11.22       |
| N1-Methyl-4-pyridone-3-carboxamide                              | 0.749909                                     | 0.022357        | 0.432115        | 7.61        |
| <b>Pipecolic acid</b>                                           | <b>0.815227</b>                              | <b>0.011061</b> | <b>0.375526</b> | <b>5.84</b> |
| Butyrylcarnitine                                                | -0.58956                                     | 0.048083        | 0.491372        | 3.75        |
| 5-Ethyl-2,4-dimethyloxazole                                     | 1.718371                                     | 0.031207        | 0.432147        | 3.68        |
| L-Tyrosine                                                      | -0.94037                                     | 0.004117        | 0.356110        | 3.66        |
| L-2-Amino-3-methylenehexanoic acid                              | 1.062436                                     | 0.003145        | 0.350528        | 2.95        |
| 3-Methylglutaryl carnitine                                      | 0.905903                                     | 0.019871        | 0.426313        | 2.90        |
| (2R,3R,4R)-2-Amino-4-hydroxy-3-methylpentanoic acid             | -0.84833                                     | 0.003346        | 0.350528        | 2.70        |
| 6-Chloro-N-(1-methylethyl)-1,3,5-triazine-2,4-diamine           | -0.51918                                     | 0.047626        | 0.490491        | 2.69        |
| apo-[3-methylcrotonoyl-CoA:carbon-dioxide ligase (ADP-forming)] | 0.802807                                     | 0.047819        | 0.491372        | 2.66        |
| SM(d18:1/22:0)                                                  | 0.491436                                     | 0.005202        | 0.366865        | 2.65        |
| L-Lysine                                                        | -0.30008                                     | 0.021755        | 0.432115        | 2.65        |
| PC(22:5(7Z,10Z,13Z,16Z,19Z)/14:0)                               | -0.21096                                     | 0.024642        | 0.432115        | 2.38        |
| Mesalazine                                                      | 0.692351                                     | 0.027319        | 0.432115        | 2.12        |
| L-cis-3-Amino-2-pyrrolidinecarboxylic acid                      | -0.92148                                     | 0.027681        | 0.432115        | 2.05        |
| 2,2,6,6-Tetramethyl-4-piperidinone                              | 0.714119                                     | 0.001805        | 0.350528        | 1.94        |
| 2-Pyridylacetic acid                                            | 0.382474                                     | 0.010914        | 0.375526        | 1.92        |
| PC(24:1(15Z)/14:1(9Z))                                          | -0.37456                                     | 0.040562        | 0.470813        | 1.88        |
| 2-Phenylacetamide                                               | -1.05102                                     | 0.003955        | 0.356110        | 1.82        |

152 *p* values are determined by unpaired, two-tailed Student's t-test, FDR were subsequently determined  
 153 by Benjamini-Hochberg correction method. Abbreviations: VIP, variable importance in projection;

154 FC, fold change; FDR, false discovery rate.

155

**Supplementary Table 4 Differentially concentrated metabolites of liver in 15-month-old mice.**

| Name                                                | Log2_FC(case mean/control mean) | P value         | FDR             | VIP         |
|-----------------------------------------------------|---------------------------------|-----------------|-----------------|-------------|
| PC(22:6(4Z,7Z,10Z,13Z,16Z,19Z)/16:0)                | 0.420746                        | 0.012218        | 0.300430        | 11.99       |
| Adenine                                             | 0.650732                        | 0.033853        | 0.406885        | 8.97        |
| 5-Aminoimidazole ribonucleotide                     | -1.49771                        | 0.049779        | 0.444688        | 6.63        |
| Methoxypyrazine                                     | -0.67912                        | 0.026163        | 0.373824        | 6.41        |
| Glutathione                                         | -2.83202                        | 0.02865         | 0.384977        | 4.79        |
| <b>Pipecolic acid</b>                               | <b>0.820006</b>                 | <b>0.021898</b> | <b>0.357343</b> | <b>4.60</b> |
| PE(16:0/22:6(4Z,7Z,10Z,13Z,16Z,19Z))                | -0.70498                        | 0.04741         | 0.442861        | 4.10        |
| Pyrrolidonecarboxylic acid                          | -1.21481                        | 0.000488        | 0.078683        | 3.88        |
| PC(16:0/16:0)                                       | -0.22273                        | 0.030587        | 0.391350        | 2.97        |
| N-a-Acetyl-L-arginine                               | 1.24795                         | 0.002213        | 0.149389        | 2.54        |
| 2-Methyl-5-propyloxazole                            | 2.39478                         | 0.008706        | 0.279332        | 2.48        |
| PC(22:5(4Z,7Z,10Z,13Z,16Z)/20:5(5Z,8Z,11Z,14Z,17Z)) | -0.75606                        | 0.032769        | 0.401953        | 2.06        |
| N-Alpha-acetyllysine                                | -0.55985                        | 0.028988        | 0.384977        | 2.06        |
| Cholesterol                                         | 1.013156                        | 0.00012         | 0.037965        | 1.79        |
| N-methyl-L-glutamic Acid                            | -0.90748                        | 0.025545        | 0.372285        | 1.79        |
| (+)-2,3-Dihydro-3-methyl-1H-pyrrole                 | 0.669816                        | 0.027761        | 0.382078        | 1.58        |
| PC(20:2(11Z,14Z)/15:0)                              | -0.40051                        | 0.010918        | 0.298467        | 1.57        |
| Sedoheptulose                                       | -2.19287                        | 0.049446        | 0.443725        | 1.45        |
| PE(22:6(4Z,7Z,10Z,13Z,16Z,19Z)/18:0)                | 0.254515                        | 0.032495        | 0.401953        | 1.41        |
| Isotheaflavin                                       | -0.21678                        | 0.037721        | 0.424625        | 1.40        |

157 *p* values are determined by unpaired, two-tailed Student's t-test, FDR were subsequently determined  
158 by Benjamini-Hochberg correction method. Abbreviations: VIP, variable importance in projection;  
159 FC, fold change; FDR, false discovery rate.

161

162

**Supplementary Table 5 Characteristics of participants.**

| Characteristics          | Untrained (n=21) | Trained (n=18) | P value |
|--------------------------|------------------|----------------|---------|
| Age (years)              | 16.57±3.63       | 15.78±1.31     | 0.798   |
| Weight (kg)              | 67.19±7.93       | 61.94±6.79     | 0.034   |
| Height (m)               | 1.76±0.07        | 1.74±0.13      | 0.923   |
| BMI (kg/m <sup>2</sup> ) | 21.68±1.56       | 19.95±1.45     | 0.001   |

163 *p* values are determined by unpaired, two-tailed Student's t-test.

164

165

**Supplementary Table 6 Sequences of gene-specific primers.**

| Gene         |         | Sequences (5'-3')           |
|--------------|---------|-----------------------------|
| Actb         | Forward | CTGTCCACCTTCCAGCAGATGT      |
|              | Reverse | CGCAACTAAGTCATAGTCCGCC      |
| Crym         | Forward | ATGAGGCAAGCGGTGCTGTATG      |
|              | Reverse | GTGGTCTTCTCACAGTGTGCAG      |
| Aass         | Forward | GACCAGCAAATTATTCACGACA      |
|              | Reverse | TTGTGATGCATCGGATAACAAC      |
| Pycr1        | Forward | GTGATGTGCTCTTCCTGGCTGTG     |
|              | Reverse | ATGTGCCTGTCCCTCAATGTTTCGC   |
| Pipox        | Forward | GGCTTATCCAGAGGACTTCTAC      |
|              | Reverse | AAAGATACTCATGGTCGATCCC      |
| Hykk         | Forward | AGGTCATTCGGATGTTCAAGGAAGAAG |
|              | Reverse | AGAGGCTGACTTGCTGAGGTCTAC    |
| Phykpl       | Forward | CATGACAACATCGTGGACTATG      |
|              | Reverse | GTACTGTGCGAGCTAGTCTCAAG     |
| Slc25a29     | Forward | GTCCATCATCAAGCAGGAGAGTGTG   |
|              | Reverse | GGAAGTATTGAGTGGTGAGTCTTGG   |
| 36B4         | Forward | GAGACTGAGTACCTTCCCAC        |
|              | Reverse | ATGCAGATCAGCCAGG            |
| TNF          | Forward | GAGTGACAAGCCTGTAGCC         |
|              | Reverse | CTCCTGGTATGAGATAGCAA        |
| IL-1 $\beta$ | Forward | CCTCGTGCTGTCGGACCCATA       |
|              | Reverse | CAGGCTTGTGCTCTGCTTGTGA      |
| iNOS         | Forward | CACCAAGCTGAACTTGAGCG        |
|              | Reverse | CGTGGCTTTGGGCTCCTC          |
| Kmt2a        | Forward | CGATGACAACCGACAGTGTGCA      |
|              | Reverse | GCTGACCACAAAGCACAGTTCAC     |



|        |         |                        |
|--------|---------|------------------------|
| Kmt2b  | Forward | GGAAGCCAGATGAAAGGACTCC |
|        | Reverse | TGGTCCAAGGATGGAGGCAACA |
| Kmt2c  | Forward | CCTATCCTCCAGAGGTTGCTGG |
|        | Reverse | TTTGCTGAGGCACATGGAAGCG |
| Kmt2d  | Forward | CACTATAAACGGCCCCATAACC |
|        | Reverse | TGACTTGGAGTGCACAAACTG  |
| Kmt2e  | Forward | GACCATCACAGGGTTTGTGG   |
|        | Reverse | CTATGCTCATGACGTTTCGCC  |
| Setd1a | Forward | CCAGGAGTCTTCCTCAGAGAAG |
|        | Reverse | GACGAGTCACTGTCCTCATCCT |
| Setd1b | Forward | GACACCAAAGGGGAAACTCG   |
|        | Reverse | GTCTCGCTCACAATCGGAGA   |

---

168

169

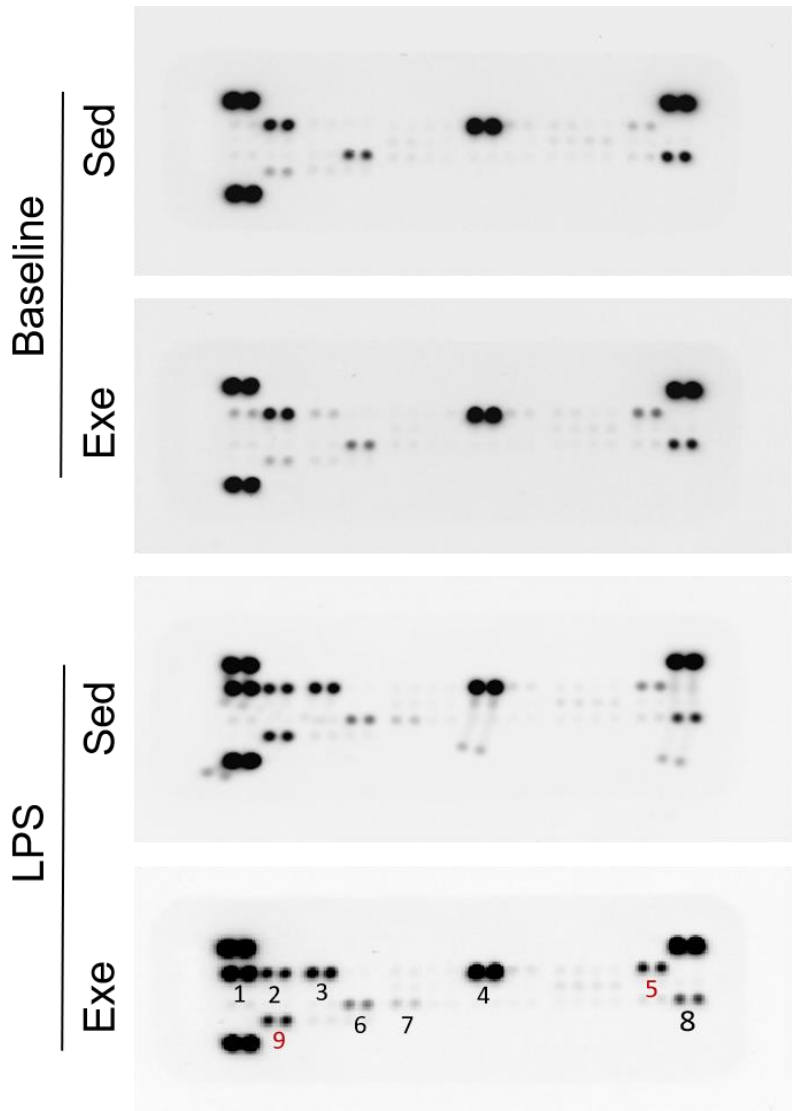

Supplement: 41467_2024_47458_MOESM1_ESM.pdf [file 41467_2024_47458_MOESM1_ESM.pdf]
